# Supplementary material for: Direct imaging of boron segregation at dislocations in B:diamond heteroepitaxial films
Source: Royal Society of Chemistry journal article supplement (doi:10.1039/c5nr07535a), 2015-12-21
Supplement: c5nr07535a1.pdf [file c5nr07535a1.pdf]

## Supplementary information

### **Direct imaging of boron segregation at dislocations in B:diamond hetero-epitaxial films**

Stuart Turner<sup>a\*</sup>, Hosni Idrissi<sup>a</sup>, André F. Sartori<sup>b</sup>, Ying-Gang Lu<sup>a,c</sup>, Svetlana Korneychuck<sup>a</sup>, Jo Verbeeck<sup>a</sup>, Matthias Schreck<sup>b</sup> and Gustaaf Van Tendeloo<sup>a</sup>

a. EMAT, University of Antwerp, Groenenborgerlaan 171, B-2020 Antwerp, Belgium

b. Universität Augsburg, Institut für Physik, D-86135 Augsburg, Germany

c. Department of Mechanical Engineering and Engineering Science, The University of North Carolina at Charlotte, 9201 University City Blvd., Charlotte, NC 28223, USA

*\*corresponding author:* [stuart.turner@uantwerpen.be](mailto:stuart.turner@uantwerpen.be)

## **S1. Characterisation of the Burgers vectors of [001] dislocations using weak-beam dark field TEM.**

The following WBDF-TEM images have been obtained in [110] oriented FIB foil. In this orientation, all the dislocations can be identified except the edge dislocations with Burgers vector  $\vec{b} = \frac{a}{2}^{[110]}$ . Indeed, all the diffraction vectors offered by the [110] zone axis are perpendicular to this Burgers vector leading to the invisibility of this family of dislocations. The WBDF image of Figure S1 was obtained with  $g = 220$  in the same region shown in Figure 2 in the main manuscript. It exhibits dislocations parallel to the [001] direction. In the WBDF image of Figure S2 obtained with  $g=004$ , some dislocations indicated by 'E' in Figure S1 vanished. This confirms that these dislocations are edge dislocations of type  $\vec{b} = \frac{a}{2}^{[110]}$ . The WBDF image of Figure S3 has been obtained using the diffraction vector  $g = 1\bar{1}1$ . In this image, the dislocations labelled 'M1' in Figure S1 are invisible even though they present a small residual contrast due to the presence of Boron at the dislocation core which can affect the diffraction contrast and the extinction conditions. This indicates that these dislocations are 45° mixed dislocations with Burgers vector of type  $\vec{b} = \frac{a}{2}^{[10\bar{1}]}$  or  $\vec{b} = \frac{a}{2}^{[011]}$ . Indeed, these two vectors make an angle of 45° with the line of the dislocations ([001]). Figure S4 exhibits WBDF image obtained with  $g = \bar{1}11$ . In this image, the dislocations labelled 'M2' in Figure S1 vanished. They are 45° dislocations with Burgers vector  $\vec{b} = \frac{a}{2}^{[101]}$  or  $\vec{b} = \frac{a}{2}^{[0\bar{1}1]}$ . Here again, a small residual contrast due to Boron segregation can be observed.

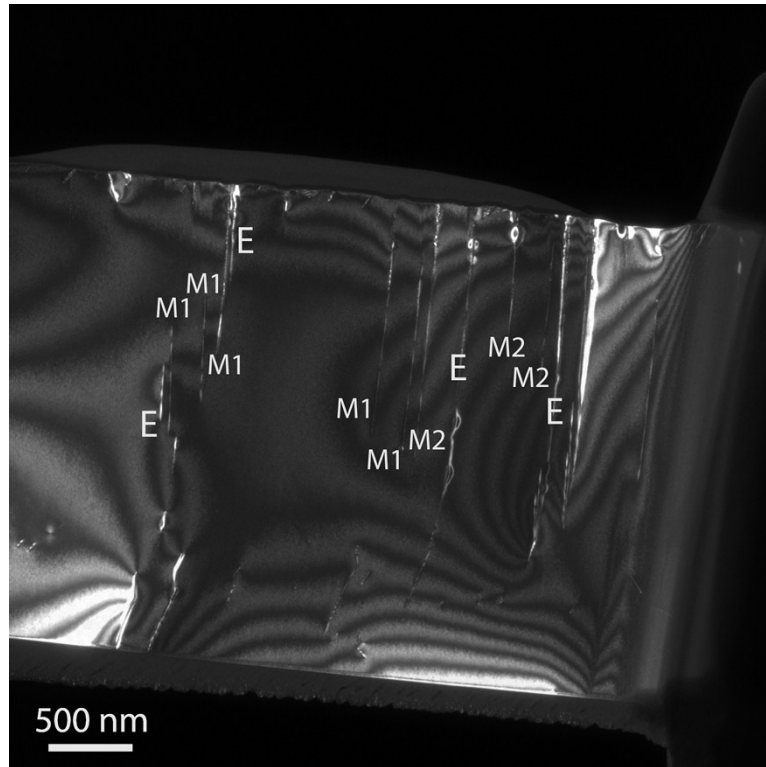

**Fig. S1 :** WBDF image obtained with  $g = 220$ . Edge dislocations are indicated by 'E' while 45° mixed dislocations are labelled 'M1' and 'M2'.

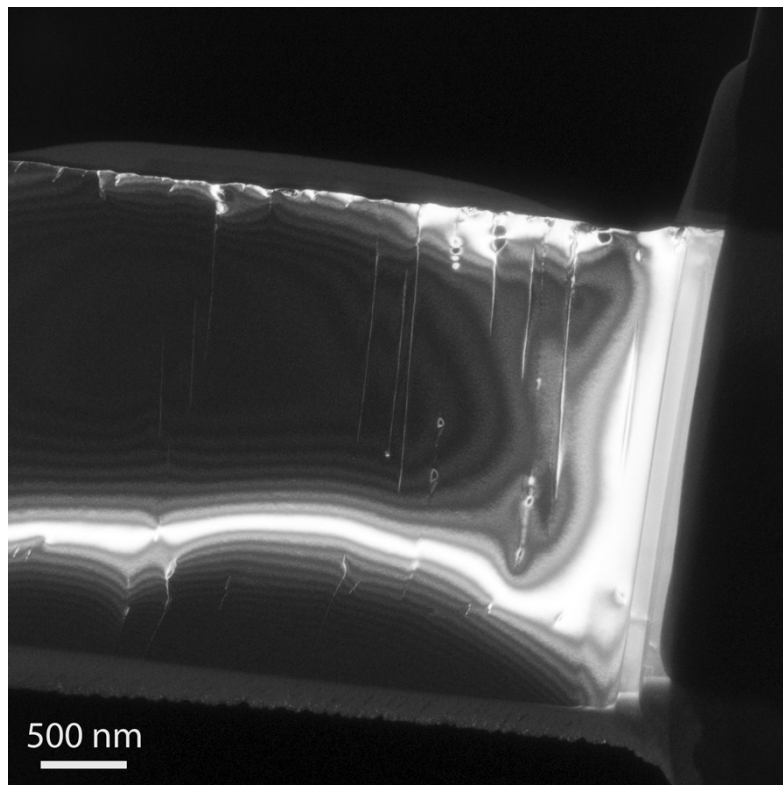

**Fig. S2 :** WBDF image obtained with  $g=004$

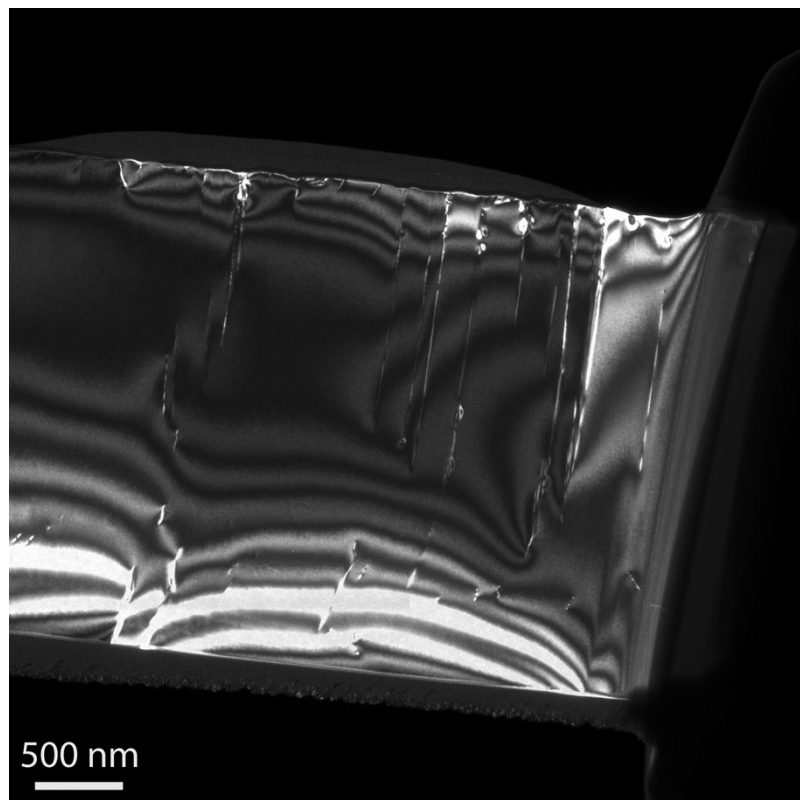

**Fig. S3** : WBDF image obtained with  $g = 111$

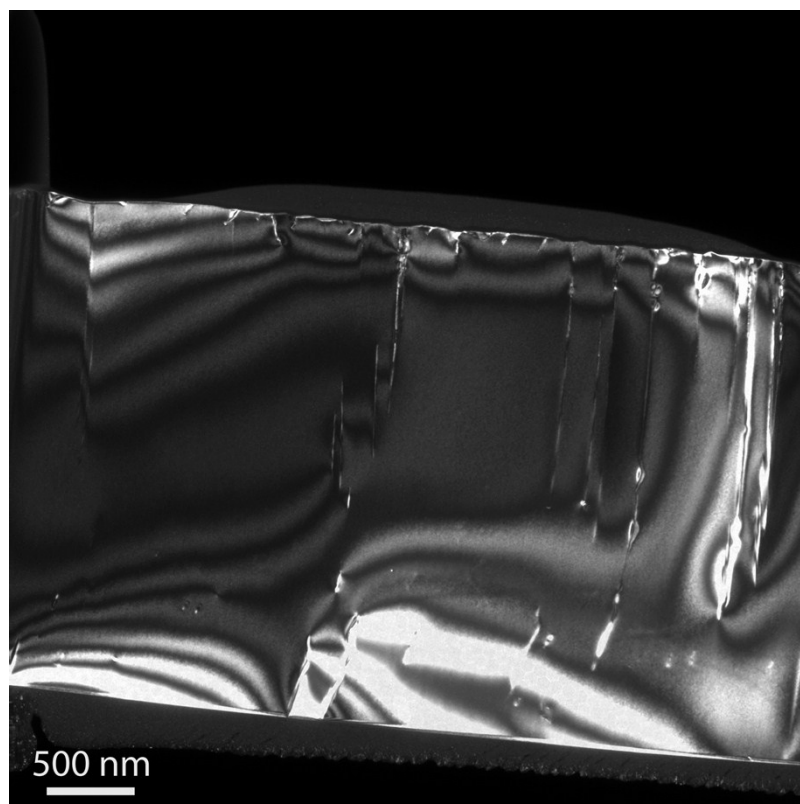

**Fig. S4** : WBDF image obtained with  $g = \bar{1}11$

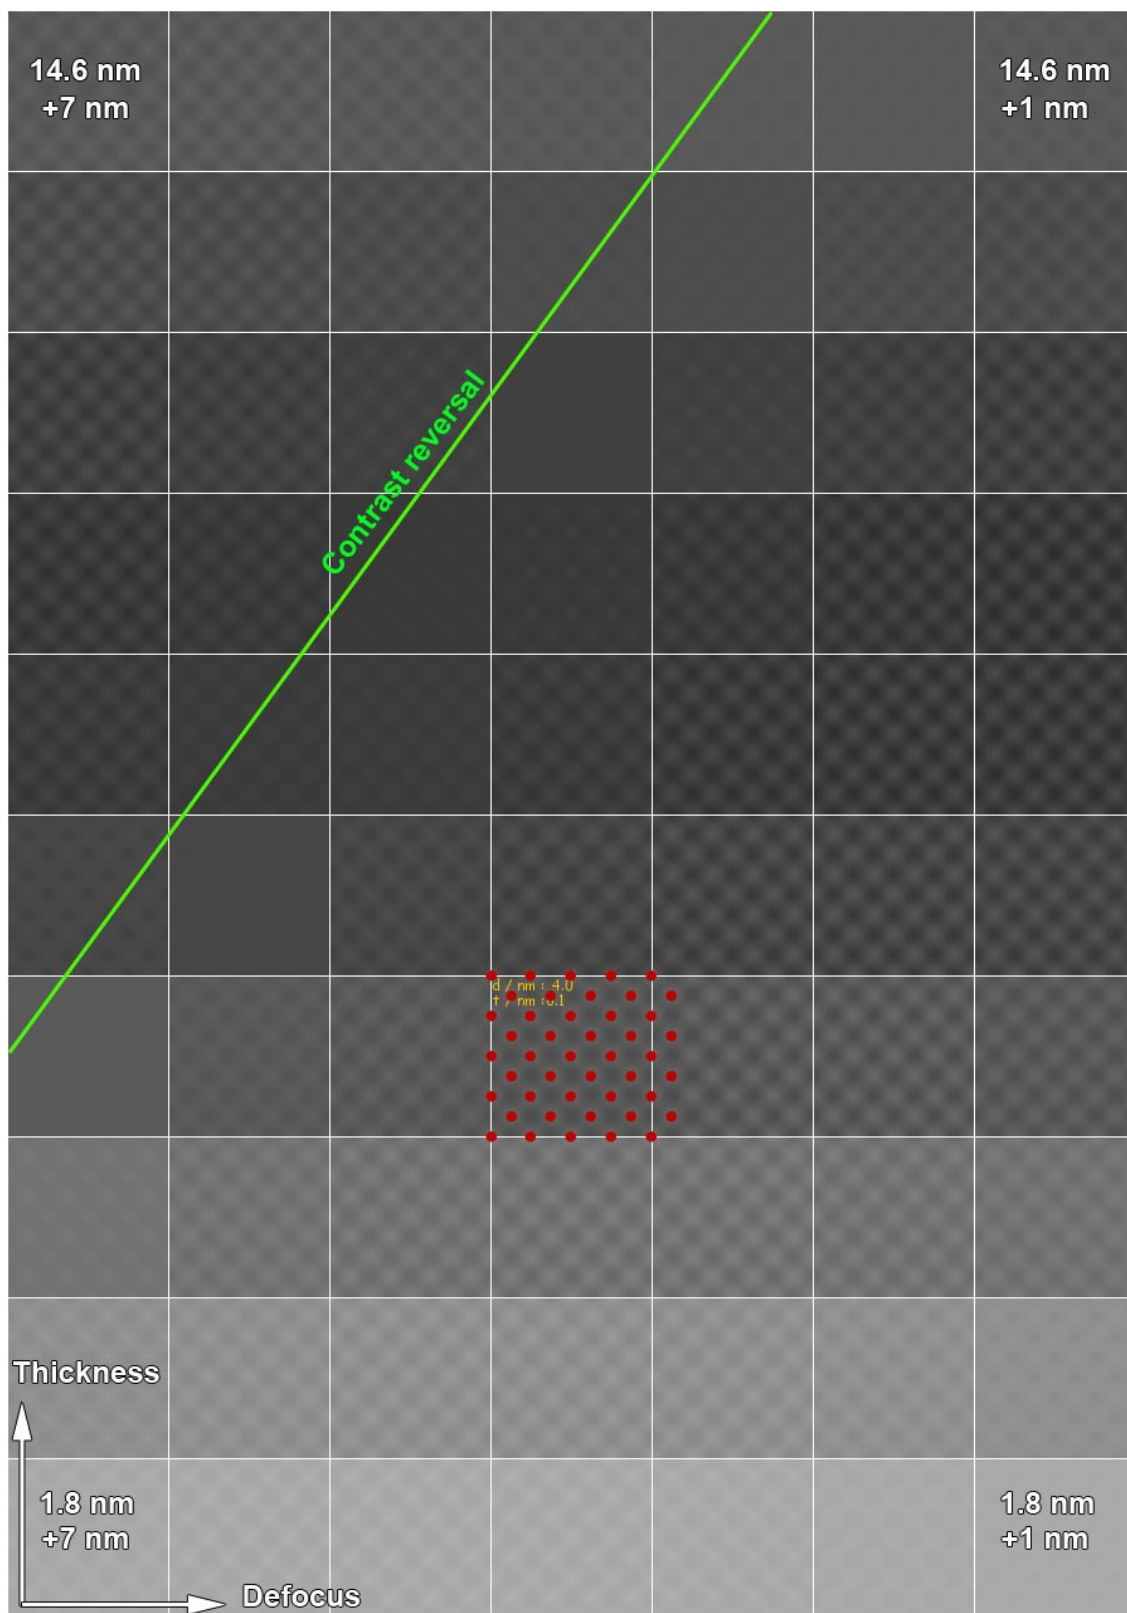

**Fig. S5 :** HRTEM image simulations for diamond along the [001] zone axis orientation. Image simulations were performed for a microscope operated at 300 kV, with the  $C_s$  value tuned to  $-12 \mu\text{m}$ . At slight overfocus conditions, in thin samples, the atomic C columns are imaged as white image contrast. The red dots represent the true atom column positions.
